# Supplementary material for: 2012 in Review
Source: Atypon-hosted journal article supplement (doi:10.1176/appi.ajp.2012.12091250), 2012-12-01
Supplement: 1233_ds001.pdf [file 1233_ds001.pdf]

## Perspectiva del 2012

**L**os editores se complacen en ofrecer selecciones personales de algunos de los artículos que encontraron especialmente interesantes e importantes en la *Publicación* de este año.

### Ajuste del Seguro para la Atención de la Salud Mental

El artículo de Barry y cols., “*Risk Adjustment in Health Insurance Exchanges for Individuals with Mental Illness* [Ajuste del riesgo en los intercambios de los seguros sanitarios para personas con enfermedades mentales]” (1), no es de fácil lectura para la mayoría de nuestros lectores Psiquiatras. Publicamos esta proyección de los efectos de la *Affordable Care Act* [Ley de Atención Asequible] de un grupo destacado de economistas de la atención sanitaria porque ilustra las clases de decisiones comerciales que influirán en el financiamiento de la atención de la salud mental en los nuevos intercambios de seguros estatales en un futuro próximo. En muchos estados es posible que los Psiquiatras de las sucursales distritales de la APA necesiten abogar por el financiamiento de la atención sanitaria, tomando en consideración las técnicas modeladas en este artículo, específicamente el reaseguro y la adaptación del riesgo para proteger la viabilidad financiera de los planes de seguros que sirven a las personas con enfermedades mentales. Garfield y Druss (2) señalan en un editorial anexo que la Ley de Atención Asequible ha introducido estas técnicas para intentar combatir la tendencia de los planes a restringir los beneficios de la atención de la salud mental. Los planes tienen una tendencia natural a restringir los beneficios para evitar la elección de su plan de seguros por los pacientes con enfermedades mentales que necesitan mayor cobertura. El artículo de Barry y cols. ilustra cómo es que pequeñas diferencias en estas técnicas de ajuste de riesgos pueden tener efectos notables en las compañías de seguros y, por lo tanto, efectos en los pacientes a quienes aseguran.

DR. ROBERT FREEDMAN

### Marcando una Diferencia en el Mundo Real

Buena parte de la práctica clínica psiquiátrica va dirigida a la supresión de síntomas específicos, especialmente en el tratamiento de esquizofrenia y trastornos relacionados. Aunque nuestros pacientes se benefician cuando estas intervenciones son eficaces, nuestros tratamientos sólo se pueden considerar verdaderamente eficaces cuando suponen realmente una diferencia en la manera en que los pacientes experimentan su vida en el mundo real. Por este motivo, mi elección para 2012 es el estudio de Bowie y colaboradores (3), que evaluó el comportamiento en el mundo real de personas con esquizofrenia tras la combinación de terapias cognitivas y de aprendizaje de habilidades funcionales. En comparación con cualquiera de estas dos intervenciones por sí solas, la combinación tuvo como consecuencia una mejora de las actividades sociales o domésticas y de las habilidades laborales. Aunque hace falta determinar el grado en el que estos efectos perdurarán a largo plazo y seguirán siendo ciertos en una muestra más amplia de personas, es nece-

sario tratar al menos a tres personas para observar una mejoría real significativa en una de ellas. Esperemos que estos resultados y los de estudios similares realizados por otros autores auguren que llegará el día en que si parafraseamos la clásica pregunta diplomática americana “¿Está mejor hoy que antes de empezar el tratamiento?”, nuestros pacientes con esquizofrenia puedan responder “¡Sí!”.

DR. DAVID A. LEWIS

## Investigación Terapéutica: la Calidad hace la Diferencia

Thoma y colaboradores (4) analizaron 120 estudios de distribución al azar y controlados de terapia cognitivo-conductual (TCC) para depresión. Como ellos y nosotros preveíamos, estos estudios demostraron la eficacia de la TCC en comparación con la falta de tratamiento, junto con la ausencia de una diferencia significativa cuando se compara la TCC con otros tratamientos activos. Hasta ahora no ha habido nada nuevo o especialmente interesante.

Sin embargo, ellos siguieron examinando la calidad metodológica de cada uno de estos estudios y observaron la aparición de un patrón interesante. En primer lugar, en contra de sus expectativas, la calidad de estos estudios de TCC no difería de la calidad de una serie de estudios de psicoterapia dinámica publicados el año pasado. En segundo lugar, la calidad no era muy buena. Por ejemplo, en más de la mitad de los estudios no se utilizaron evaluadores ciegos para examinar los resultados, no se analizaron los resultados en lo que respecta a la intención de tratar y no se hizo una consideración estadística apropiada de los efectos del terapeuta y del centro.

En tercer lugar, la calidad mejoró constantemente con el paso del tiempo en los estudios de TCC y de psicoterapia dinámica. Ocho estudios publicados desde el año 2005 eran mejores que cualquier estudio aparecido en los 30 años anteriores. Esto indica que el sistema de investigación está funcionando adecuadamente y que genera datos cada vez más fiables y válidos en el proceso.

Su resultado final no les sorprendió, aunque debería preocuparles tanto a ellos como a nosotros. Predijeron que una peor calidad metodológica de los estudios se correlacionaría con una mayor magnitud del efecto y una variabilidad más amplia, como así fue.

Suponían que la variabilidad podría ser una consecuencia de “unas condiciones experimentales deficientemente controladas” que posibilitaran una “mayor cabida para diversos sesgos del observador”. Y quizá, unos controles más estrechos y una menor variabilidad podrían haber disminuido el “ruido” permitiendo, por tanto, la aparición de una señal más potente. Sin embargo, sus resultados son claros. La asociación de una peor calidad con una mayor magnitud del efecto podría significar que los efectos reportados se debieron a una mezcla de efectos verdaderos y de una clase de prueba proyectiva de los investigadores. Como señalan, podría reflejar también un sesgo de publicación, por el que los estudios de peor calidad con menores magnitudes del efecto no llegarían nunca a publicarse. En cualquier caso, esto indica que los verdaderos efectos de la psicoterapia (y de otros tratamientos) podrían ser menores de lo que señalan muchos cálculos actuales.

Se trata de un estudio importante con resultados relevantes para la investigación psiquiátrica y de otras terapias en general así como para la investigación psicoterapéutica en particular.

DR. ROBERT MICHELS

## Seguimiento del Desarrollo Cerebral Infantil

Durante años, los científicos han considerado la investigación sobre el desarrollo cerebral esencial para descubrir las causas de la enfermedad mental. Sin embargo, las implicaciones clínicas de este tipo de investigación han aparecido lentamente a causa de la dificultad para evaluar de manera segura el desarrollo del cerebro infantil. Mi artículo preferido de la revista de este año, escrito por Wolff y cols. (5), podría empezar a invertir esta tendencia.

Wolff y colaboradores evaluaron repetidamente a 92 lactantes con riesgo de autismo utilizando imágenes con tensor de difusión, que indexa la integridad de las vías de la sustancia blanca cerebral. Los investigadores utilizaron después estos datos para comparar el desarrollo cerebral de los 28 lactantes que cumplieron en última instancia los criterios de autismo con los 64 que no los cumplieron. Los resultados indican que los signos de autismo se manifiestan en el cerebro antes de que sean claramente perceptibles los síntomas clínicos. Además, estos signos continúan cambiando durante la lactancia, lo cual hace concebir esperanzas de que el progreso de esta cascada en desarrollo se vea interrumpido y hasta posiblemente se evite la aparición del autismo. Estos resultados no solo generan un interés científico tremendo, sino que permiten que los clínicos y neurocientíficos se unan en su búsqueda de los signos del desarrollo anormal del lactante. Esta búsqueda conjunta proporciona un foco en el que podrían converger los intentos de desarrollo de tratamientos nuevos.

DR. DANIEL S. PINE

## Ponderación de las Estrategias Terapéuticas para la Bulimia Nerviosa

El artículo sobre tratamiento psiquiátrico titulado "*The Changing 'Weightscape' of Bulimia Nervosa*", de Bulik y colaboradores (6), proporciona una oportunidad destacable para examinar el efecto de la epidemia de obesidad en la práctica clínica. En este artículo basado en un caso, Bulik y cols. ponen de manifiesto la influencia particularmente compleja de la obesidad en el tratamiento de la bulimia nerviosa, una enfermedad en la que las preocupaciones con fluctuaciones en el peso son intrínsecas al trastorno. El caso hace referencia a una mujer joven con un índice de masa corporal (IMC) de 38, por lo que la obesidad mórbida es una cuestión clave en su tratamiento. En lugar de la terapia cognitivo-conductual (TCC) convencional que se puede utilizar normalmente para la bulimia nerviosa, ella participó en un programa de TCC modificada que le permitía fijar objetivos personalizados que incluían un régimen de ejercicio físico. Este es un magnífico ejemplo de cómo ir más allá del enfoque tradicional centrado en los síntomas para hacer frente a importantes cuestiones de salud y a la obesidad comórbida. Es un hecho admitido que los enfermos crónicos que precisan de antipsicóticos tienen un gran riesgo de obesidad, aunque el problema de salud pública ya va más allá de este subgrupo. En 161 pacientes ambulatorios con trastorno bipolar, Fiedorowicz y cols. describieron que la media del IMC era de 30.8, es decir, que presentaban obesidad (7). En una muestra de población, la obesidad se ha asociado también a un aumento de aproximadamente 25% de la probabilidad de que existan trastornos de ansiedad y de alteración del estado de ánimo (8). El índice general de obesidad en los adultos jóvenes es actualmente del 35.7% y el índice de obesidad infantil se ha triplicado desde el

año 1980 (9). En consecuencia, puede ser necesario que la atención psiquiátrica se ocupe del ejercicio y de los objetivos dietéticos para conseguir los mejores resultados para nuestros pacientes, de los cuales los más jóvenes tienen un gran riesgo de sufrir las consecuencias perjudiciales del exceso de peso durante su vida.

DRA. SUSAN K. SCHULTZ

## Antidepresivos y Depresión durante el Embarazo

El embarazo constituye un periodo en el que no se asumen riesgos ni se toman medicamentos que no sean esenciales. Por ello ha crecido en importancia la cuestión de si se deben tomar o no y cuándo, antidepresivos durante el embarazo, ya que ha aumentado la proporción de mujeres en edad fértil que toman antidepresivos. Es por esta razón por la que es tan útil el artículo de Nulman y cols. (10). Estos científicos se preguntaron cuál es el efecto de los antidepresivos, de la depresión materna o de ambos en el neurodesarrollo infantil a largo plazo. Examinaron esta cuestión haciendo un análisis de niños canadienses (de entre 3 y 6 años y 11 meses de edad) cuyas madres tomaron antidepresivos durante el embarazo (venlafaxina o SSRI, Inhibidor Selectivo de la Recaptura de Serotonina), no recibieron tratamiento antidepresivo durante este periodo o estaban sanas y no necesitaron ningún tratamiento. Los niños expuestos a la depresión materna tuvieron unos IQ más bajos y más problemas de comportamiento que los del grupo sano, aunque estos resultados se correlacionaron con el grado de depresión materna y no con la dosis o la duración del tratamiento antidepresivo. Aunque durante el embarazo hubo una relación entre resultados adversos y depresión, dicha relación se dio con la gravedad de la propia depresión, no con el antidepresivo.

El tratamiento de la depresión es realmente importante, y los niños pueden verse adversamente afectados, pero por la enfermedad y no por el antidepresivo.

DRA. CAROL A. TAMMINGA

## De *The Residents' Journal*: perspectiva de las “sales de baño”

Ha sido un año de éxito para *The Residents' Journal* [La Publicación del Residente]. Con tantos artículos destacables remitidos, no ha sido fácil la tarea de seleccionar la “Elección del Editor”. En “*Bath Salts: Emergence of an Epidemic* [‘Sales de Baño’: La Aparición de una Epidemia]” (11), Loeffler presenta a los lectores las *Sales de Baño*, que constituyen un grupo peligroso de drogas sintéticas, estructuralmente semejantes que son indetectables en los análisis de orina convencionales y que hasta hace poco tiempo se han vendido legalmente. Las *Sales de Baño* son catinonas sintéticas, unos compuestos que se unen a la norepinefrina, la dopamina y a los transportadores de la monoamina serotonina. Loeffler describe dos clases de *sales de baño*: 1) mefedrona (4-metilmetcatinona), que es un polvo blanquecino-amarillo que produce un estado de excitación que puede consistir en euforia, intensificación de las sensaciones y “sentimientos de proximidad, sociabilidad y locuacidad”; y 2) MDPV (metilendioxiptovalerona), que produce una excitación que dura casi el doble de la observada con mefedrona y que produce también sensaciones de aumento de los estímulos y euforia. La mefedrona se ha vinculado con una amplia gama de efectos colaterales, desde la psicosis hasta la muerte. La MDPV se ha asociado a crisis de angustia graves, psicosis (incluida la paranoia) y comportamientos violentos. Las recomendaciones para el tratamiento de la intoxicación

por *Sales de Baño* se limitan principalmente al uso de benzodiacepinas, líquidos intravenosos y medidas de apoyo. La visión de conjunto exhaustiva de Loeffler destaca por su actualidad y relevancia, así como por abordar una cuestión importante y novedosa para muchos de nuestros lectores. Loeffler proporciona a las personas en formación la información crucial que necesitan para mantenerse al día en este importante campo.

**DRA. MONIFA SEAWELL**

### Bibliografía

1. Barry CL, Weiner JP, Lemke K, Busch SH: Risk adjustment in health insurance exchanges for individuals with mental illness. *Am J Psychiatry* 2012; 169:704–709
2. Garfield RL, Druss BG: Health reform, health insurance, and mental health care. *Am J Psychiatry* 2012; 169: 675–677
3. Bowie CR, McGurk SR, Mausbach B, Patterson TL, Harvey PD: Combined cognitive remediation and functional skills training for schizophrenia: effects on cognition, functional competence, and real-world behavior. *Am J Psychiatry* 2012; 169:710–718
4. Thoma NC, McKay D, Gerber AJ, Milrod BL, Edwards AR, Kocsis JH: A quality-based review of randomized controlled trials of cognitive-behavioral therapy for depression: an assessment and metaregression. *Am J Psychiatry* 2012; 169:22–30
5. Wolff JJ, Gu H, Gerig G, Elison JT, Styner M, Gouttard S, Botteron KN, Dager SR, Dawson G, Estes AM, Evans AC, Hazlett HC, Kostopoulos P, McKinstry RC, Paterson SJ, Schultz RT, Zwaigenbaum L, Piven J; IBIS Network: Differences in white matter fiber tract development present from 6 to 24 months in infants with autism. *Am J Psychiatry* 2012; 169:589–600
6. Bulik CM, Marcus MD, Zerwas S, Levine MD, La Via M: The changing “weightscape” of bulimia nervosa. *Am J Psychiatry* 2012; 169:1031–1036
7. Fiedorowicz JG, Palagummi NM, Forman-Hoffman VL, Miller DD, Haynes WG: Elevated prevalence of obesity, metabolic syndrome, and cardiovascular risk factors in bipolar disorder. *Ann Clin Psychiatry* 2008; 20: 131–137
8. Simon GE, Von Korff M, Saunders K, Miglioretti DL, Crane PK, van Belle G, Kessler RC: Association between obesity and psychiatric disorders in the US adult population. *Arch Gen Psychiatry* 2006; 63:824–830
9. Centers for Disease Control and Prevention: Overweight and Obesity. <http://www.cdc.gov/obesity/data/facts.html>
10. Nulman I, Koren G, Rovet J, Barrera M, Pulver A, Streiner D, Feldman B: Neurodevelopment of children following prenatal exposure to venlafaxine, selective serotonin reuptake inhibitors, or untreated maternal depression. *Am J Psychiatry* 2012; 169:1165–1174
11. Loeffler G: “Bath salts”: emergence of an epidemic. *Residents’ Journal: A Publication of the American Journal of Psychiatry*, March 2012, pp 13–15. [http://ajp.psychiatryonline.org/residents\\_journal.aspx](http://ajp.psychiatryonline.org/residents_journal.aspx)

*Diríjase la correspondencia al Dr. Freedman (ajp@psych.org). Editorial aceptado para su publicación en septiembre de 2012 (doi: 10.1176/appi.ajp.2012.12091250).*

*Las declaraciones de conflictos de intereses de los editores de The American Journal of Psychiatry se publican cada año en el número del mes de enero. El Dr. Pine actúa según su capacidad personal; las opiniones expresadas son las suyas y no representan necesariamente las de los NIH ni las del gobierno de los EUA.*
